# Supplementary material
Source: MDPI journal article supplement (https://www.mdpi.com/2073-4395/13/6/1593)
Supplement: s1 [file s1]

**Table S1.** Rainfall and temperature at Thanh Phu district, Ben Tre province

| Years | Rainfall (mm) |      |      |      |     | Temperature (oC) |      |      |      |      |
|-------|---------------|------|------|------|-----|------------------|------|------|------|------|
|       | 2019          |      |      | 2020 |     | 2019             |      |      | 2020 |      |
|       | Months        |      |      |      |     | Months           |      |      |      |      |
| Days  | Sep           | Oct  | Nov  | Dec  | Jan | Sep              | Oct  | Nov  | Dec  | Jan  |
| 1     | 0.0           | 12.9 | 27.5 | 0.0  | 0.0 | 28.3             | 27.6 | 27.0 | 26.9 | 26.8 |
| 2     | 0.0           | 0.0  | 0.0  | 0.0  | 0.0 | 27.2             | 27.6 | 26.6 | 26.6 | 26.5 |
| 3     | 13.9          | 0.0  | 14.2 | 0.0  | 0.0 | 26.3             | 27.8 | 27.0 | 26.1 | 26.8 |
| 4     | 19.8          | 0.0  | 0.0  | 0.0  | 0.0 | 26.5             | 27.3 | 27.8 | 24.2 | 26.7 |
| 5     | 3.9           | 3.7  | 6.3  | 0.0  | 0.0 | 27.4             | 27.3 | 27.3 | 24.7 | 26.5 |
| 6     | 0.0           | 0.0  | 8.4  | 0.0  | 0.0 | 28.5             | 28.4 | 27.2 | 24.5 | 25.8 |
| 7     | 0.0           | 0.0  | 35.5 | 0.0  | 0.0 | 28.4             | 27.1 | 26.4 | 24.2 | 27.2 |
| 8     | 0.0           | 5.2  | 0.0  | 0.0  | 0.0 | 27.5             | 28.3 | 26.7 | 24.7 | 27.6 |
| 9     | 0.0           | 0.0  | 0.0  | 0.0  | 0.0 | 28.4             | 28.6 | 27.2 | 24.1 | 26.9 |
| 10    | 0.0           | 14.7 | 0.0  | 0.0  | 0.0 | 29.2             | 26.5 | 25.8 | 24.3 | 27.5 |
| 11    | 0.0           | 0.0  | 0.0  | 0.0  | 0.0 | 29.3             | 27.9 | 25.1 | 24.6 | 26.3 |
| 12    | 0.0           | 0.0  | 0.0  | 0.0  | 0.0 | 29.4             | 28.4 | 25.9 | 25.3 | 26.5 |
| 13    | 0.0           | 59.0 | 0.0  | 0.0  | 0.0 | 27.4             | 27.6 | 26.3 | 25.9 | 26.9 |
| 14    | 10.0          | 0.0  | 0.0  | 0.0  | 0.0 | 27.2             | 28.5 | 27.3 | 26.1 | 25.8 |
| 15    | 0.0           | 0.0  | 0.0  | 0.0  | 0.0 | 26.2             | 28.8 | 27.0 | 26.5 | 26.5 |
| 16    | 19.1          | 0.0  | 0.0  | 0.0  | 0.0 | 25.2             | 28.6 | 26.8 | 27.1 | 26.4 |
| 17    | 4.3           | 0.0  | 0.0  | 0.0  | 0.0 | 27.8             | 29.0 | 27.4 | 27.0 | 26.5 |
| 18    | 12.8          | 0.0  | 0.0  | 0.0  | 0.0 | 26.3             | 28.9 | 27.1 | 26.8 | 26.7 |
| 19    | 0.0           | 0.0  | 0.0  | 0.0  | 0.0 | 26.3             | 28.1 | 27.8 | 26.9 | 26.8 |
| 20    | 7.9           | 0.0  | 0.0  | 0.0  | 0.0 | 27.4             | 28.7 | 27.2 | 26.3 | 26.3 |
| 21    | 6.9           | 0.0  | 0.0  | 0.0  | 0.0 | 26.2             | 29.3 | 26.6 | 26.2 | 27.0 |
| 22    | 11.2          | 0.0  | 0.0  | 0.0  | 0.0 | 26.5             | 29.1 | 26.7 | 26.1 | 26.4 |
| 23    | 0.0           | 0.0  | 0.0  | 0.0  | 0.0 | 27.6             | 28.8 | 27.0 | 26.4 | 26.7 |
| 24    | 0.0           | 0.0  | 0.0  | 0.0  | 0.0 | 28.8             | 28.6 | 28.0 | 26.3 | 26.3 |
| 25    | 0.0           | 0.0  | 0.0  | 0.0  | 0.0 | 29.5             | 29.0 | 27.8 | 25.9 | 26.3 |
| 26    | 0.0           | 0.0  | 0.0  | 0.0  | 0.0 | 29.2             | 29.3 | 28.2 | 24.2 | 25.0 |
| 27    | 0.0           | 0.0  | 0.0  | 0.0  | 0.0 | 28.3             | 29.0 | 27.4 | 25.6 | 24.8 |
| 28    | 0.0           | 0.0  | 0.0  | 0.0  | 0.0 | 28.4             | 28.5 | 28.0 | 25.1 | 25.4 |
| 29    | 0.0           | 7.4  | 0.0  | 0.0  | 0.0 | 28.6             | 27.5 | 27.8 | 24.6 | 25.4 |
| 30    | 9.6           | 0.0  | 0.0  | 0.0  | 0.0 | 26.7             | 28.7 | 27.3 | 26.9 | 26.3 |
| 31    |               | 3.8  |      | 0.0  | 0.0 |                  | 27.8 |      | 27.8 | 26.1 |

**Table S2.** Rainfall and temperature at U Minh Thuong district, Kien Giang province

|       | Rainfall (mm) |      |      |     |      | Temperature (oC) |      |      |      |      |
|-------|---------------|------|------|-----|------|------------------|------|------|------|------|
| Years | 2019          |      |      |     | 2020 | 2019             |      |      |      | 2020 |
|       | Months        |      |      |     |      | Months           |      |      |      |      |
| Days  | Sep           | Oct  | Nov  | Dec | Jan  | Sep              | Oct  | Nov  | Dec  | Jan  |
| 1     | 0.0           | 4.8  | 15.8 | 4.2 | 0.0  | 28.0             | 28.8 | 28.0 | 28.3 | 27.4 |
| 2     | 0.0           | 22.8 | 2.0  | 0.0 | 0.0  | 27.1             | 29.3 | 28.9 | 28.0 | 27.6 |
| 3     | 0.6           | 15.8 | 0.0  | 0.0 | 0.0  | 27.0             | 29.9 | 28.8 | 26.0 | 27.6 |
| 4     | 0.8           | 0.2  | 1.6  | 0.0 | 0.0  | 26.3             | 28.1 | 28.4 | 24.3 | 27.2 |
| 5     | 0.0           | 0.6  | 0.0  | 0.0 | 0.0  | 27.2             | 28.3 | 29.1 | 24.2 | 26.5 |
| 6     | 0.0           | 0.0  | 0.0  | 0.0 | 0.0  | 28.2             | 29.1 | 29.1 | 24.7 | 27.1 |
| 7     | 0.0           | 0.0  | 23.4 | 0.0 | 0.0  | 28.1             | 28.6 | 28.6 | 22.6 | 28.0 |
| 8     | 20.0          | 0.0  | 0.4  | 0.0 | 0.0  | 27.1             | 29.2 | 28.2 | 23.9 | 28.8 |
| 9     | 19.2          | 0.0  | 0.6  | 0.0 | 0.0  | 27.9             | 29.4 | 28.3 | 24.2 | 27.7 |
| 10    | 0.0           | 26.0 | 0.0  | 0.0 | 0.0  | 27.4             | 29.2 | 27.6 | 25.3 | 28.1 |
| 11    | 0.0           | 0.4  | 0.0  | 0.0 | 0.0  | 28.9             | 29.3 | 28.2 | 25.8 | 28.1 |
| 12    | 0.0           | 1.2  | 0.0  | 0.0 | 0.0  | 29.7             | 29.5 | 27.9 | 26.0 | 27.5 |
| 13    | 0.0           | 0.0  | 0.0  | 0.0 | 0.0  | 29.7             | 29.2 | 29.1 | 26.5 | 27.3 |
| 14    | 25.2          | 0.2  | 2.2  | 0.0 | 0.0  | 27.3             | 29.6 | 29.0 | 27.0 | 26.5 |
| 15    | 45.0          | 0.2  | 0.0  | 0.0 | 0.0  | 27.2             | 29.9 | 27.5 | 27.5 | 26.2 |
| 16    | 41.2          | 0.2  | 0.0  | 0.0 | 0.0  | 27.4             | 29.7 | 29.2 | 27.9 | 27.5 |
| 17    | 14.0          | 3.0  | 0.0  | 0.2 | 0.0  | 25.9             | 29.4 | 29.2 | 28.2 | 28.2 |
| 18    | 48.4          | 25.0 | 0.0  | 0.0 | 0.0  | 26.5             | 29.5 | 29.1 | 28.9 | 27.9 |
| 19    | 7.8           | 16.0 | 0.0  | 6.2 | 0.0  | 27.4             | 28.6 | 28.8 | 27.6 | 27.3 |
| 20    | 5.2           | 0.0  | 0.0  | 0.0 | 0.0  | 29.2             | 29.1 | 28.1 | 27.2 | 27.7 |
| 21    | 0.4           | 0.0  | 12.4 | 0.0 | 0.0  | 28.4             | 29.4 | 27.8 | 27.6 | 28.5 |
| 22    | 0.0           | 4.4  | 2.0  | 0.0 | 0.0  | 28.8             | 29.8 | 28.2 | 28.0 | 27.9 |
| 23    | 0.0           | 0.0  | 0.0  | 0.0 | 0.0  | 28.9             | 29.8 | 28.4 | 28.7 | 27.7 |
| 24    | 0.0           | 0.0  | 6.0  | 0.0 | 0.0  | 30.1             | 29.1 | 28.5 | 27.8 | 27.8 |
| 25    | 0.0           | 0.0  | 0.0  | 0.0 | 0.0  | 30.7             | 29.5 | 28.2 | 27.6 | 27.8 |
| 26    | 0.0           | 0.0  | 0.0  | 0.0 | 0.0  | 28.9             | 30.2 | 28.4 | 27.8 | 27.2 |
| 27    | 0.0           | 0.0  | 0.0  | 0.0 | 0.0  | 29.9             | 30.1 | 29.0 | 26.6 | 27.2 |
| 28    | 0.0           | 0.0  | 0.0  | 0.0 | 0.0  | 28.0             | 30.0 | 29.0 | 26.7 | 27.5 |
| 29    | 0.0           | 0.0  | 0.0  | 0.0 | 0.0  | 28.9             | 28.8 | 28.8 | 26.5 | 27.0 |
| 30    | 0.0           | 0.0  | 0.0  | 0.0 | 0.0  | 28.5             | 30.3 | 28.5 | 28.0 | 27.1 |
| 31    |               | 0.0  |      | 0.0 | 0.0  |                  | 29.2 |      | 27.6 | 26.4 |
